# Supplementary material for: Templated synthesis of CsPbBr3 nanowire arrays toward low dark current drift and stable X-ray detectors
Source: Royal Society of Chemistry journal article supplement (doi:10.1039/d4tc01549e), 2024-01-01
Supplement: d4tc01549e1.pdf [file d4tc01549e1.pdf]

## Supporting Information

### Templated Synthesis of CsPbBr<sub>3</sub> Nanowire Arrays Toward Low Current Drift and Stable X-ray Detector

Zhaolin Song, Menghua Zhu,\* Sixin Chen, Meng Xu and Wanqi Jie

State Key Laboratory of Solidification Processing, Key Laboratory of Radiation Detection Materials and Devices, and School of Materials Science and Engineering, Northwestern Polytechnical University, Xi'an 710072, China.

Email: [mhzhu@nwpu.edu.cn](mailto:mhzhu@nwpu.edu.cn)

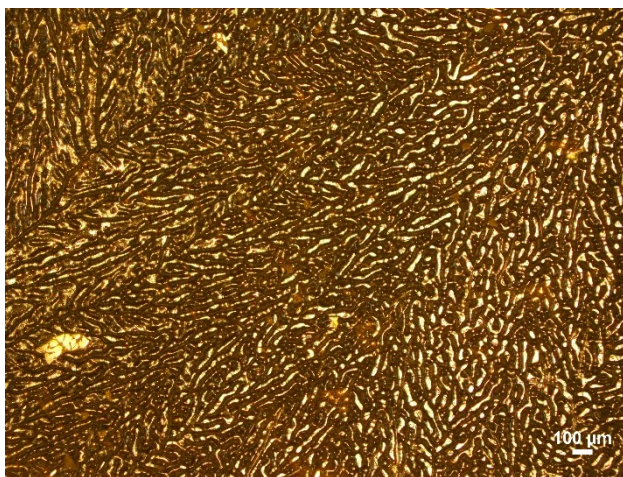

**Fig. S1** Random crystallization structures on the surface of CsPbBr<sub>3</sub> films without quartz glass.

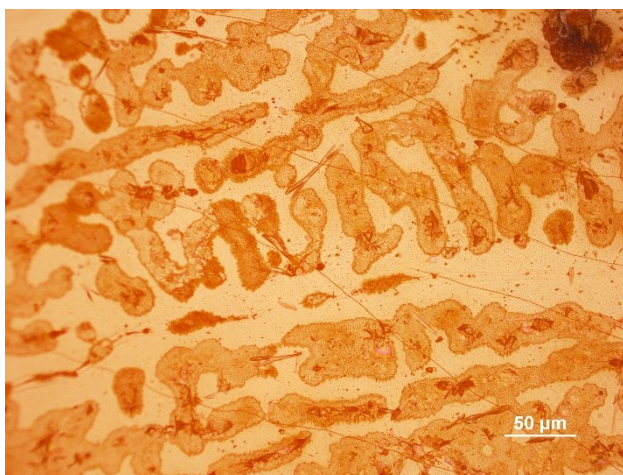

**Fig. S2** Polycrystalline layer on the top of CsPbBr<sub>3</sub> films.

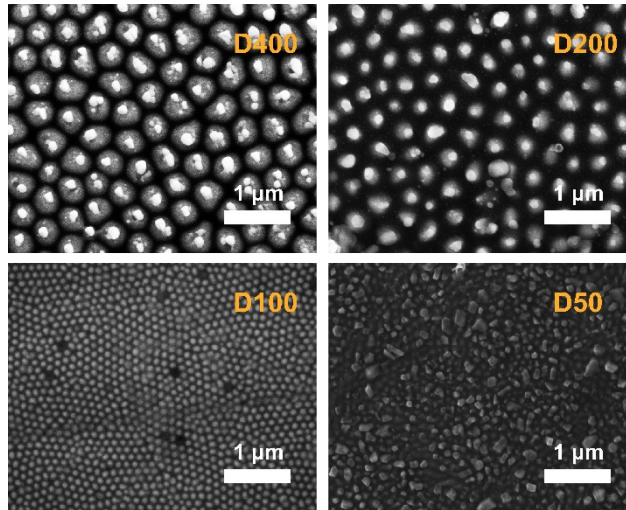

Fig. S3 Surface SEM images of D400, D200, D100 and D50 in the secondary-electron mode.

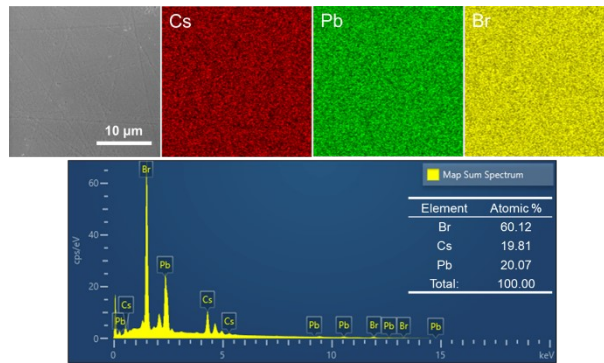

Fig. S4 Energy dispersive spectrum analysis of CsPbBr<sub>3</sub> films.

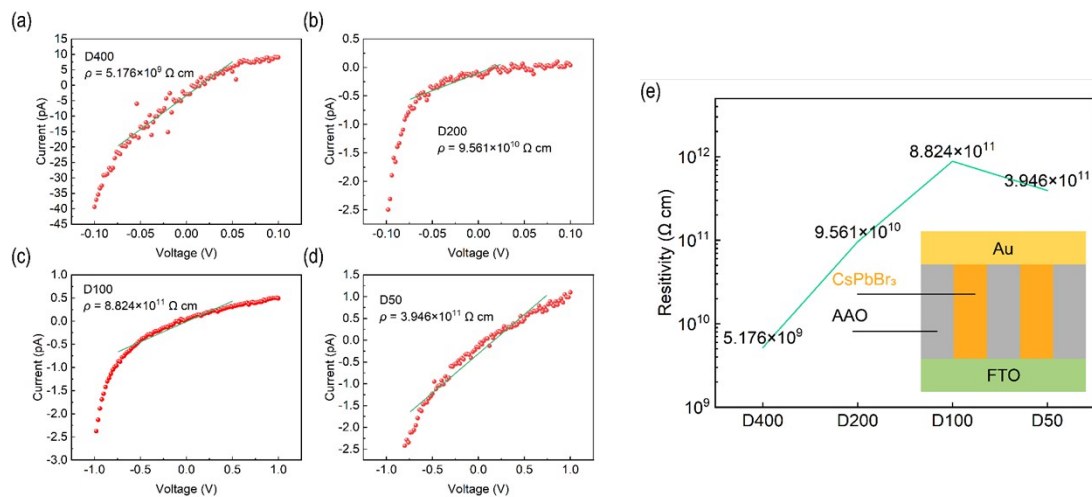

Fig. S5 (a-d) Low-voltage  $I$ - $V$  characteristics and resistivity: (a) D400, (b) D200, (c) D100 and (d) D50. (e) FTO/AAO-CsPbBr<sub>3</sub>/Au structure and resistivity versus pore size.

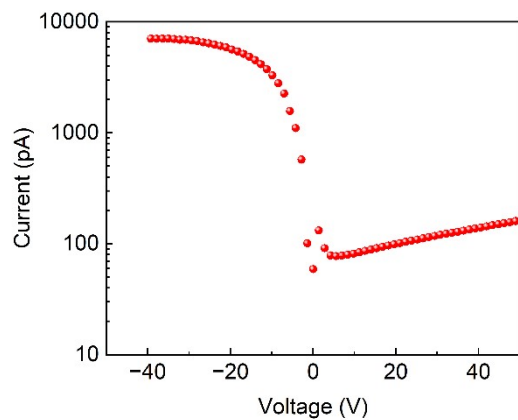

**Fig. S6** *I-V* curves of D400.

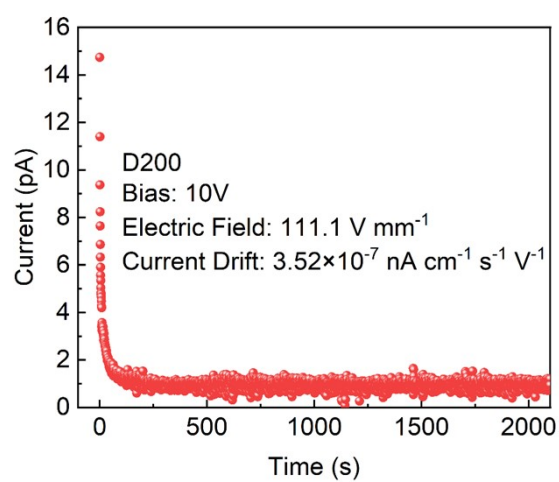

**Fig. S7** Dark current drift of D200 at a bias of 10 V.

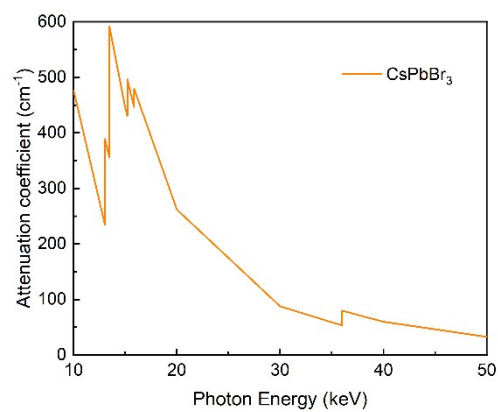

**Fig. S8** Attenuation coefficient of CsPbBr<sub>3</sub> for photons with energy of 10-50 keV.

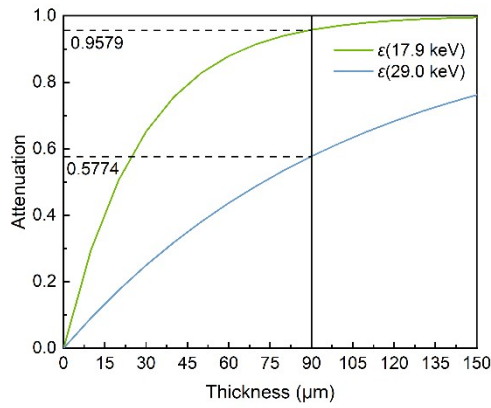

**Fig. S9** Attenuation rate of CsPbBr<sub>3</sub> for X-rays.

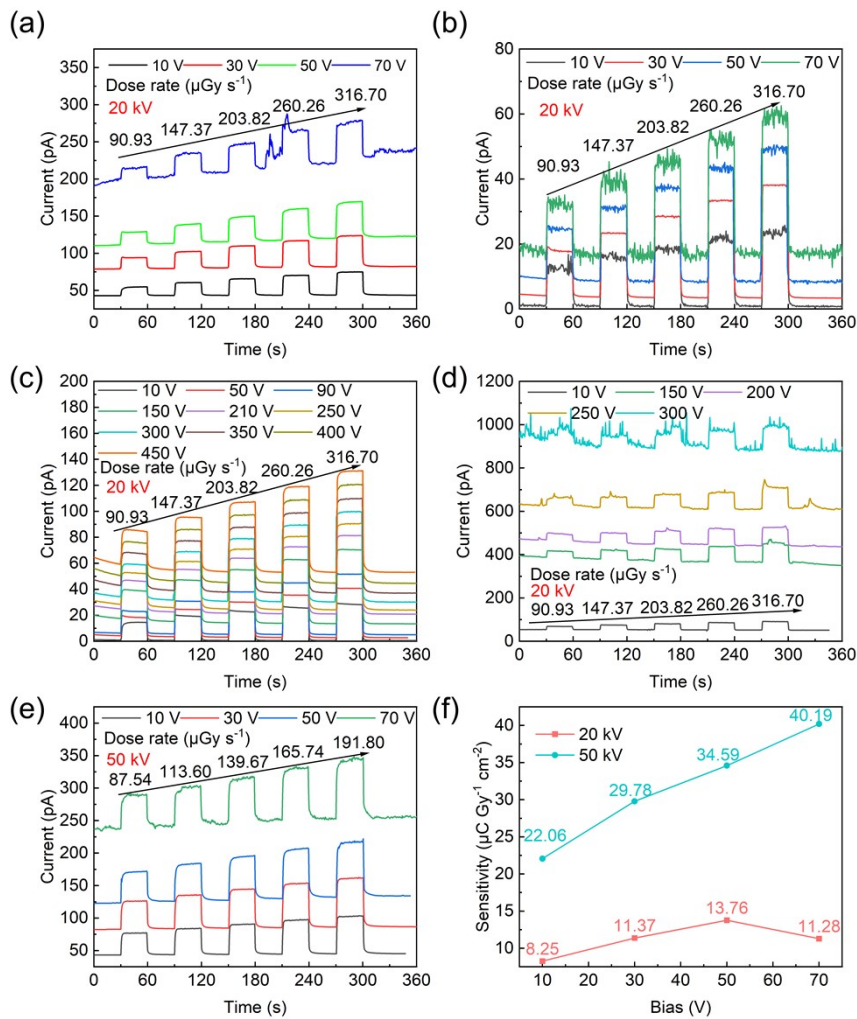

**Fig. S10** (a-d) X-ray response of AAO-CsPbBr<sub>3</sub> films (a) D400, (b) D200 (c) D100 and (d) D50 at 20 kVp. (e) X-ray response of D400 at 50 kVp. (f) Sensitivity versus of D400.

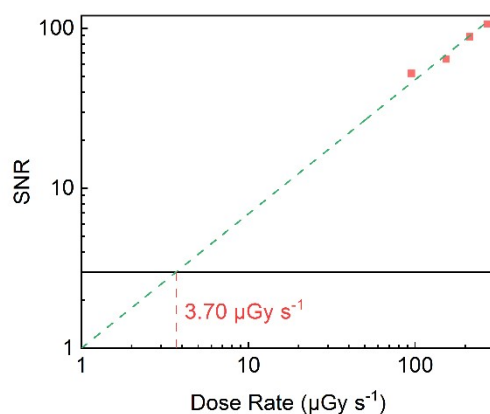

**Fig. S11** The detection limit of AAO-CsPbBr<sub>3</sub> columnar crystal films.

**Table S1** Calibrated and actual absorbed dose rates at different tube voltages and tube current.

| Tube voltage (kV) | Tube current (μA) | Calibrated dose rate (μGy s <sup>-1</sup> ) | Actual absorbed dose rate (μGy s <sup>-1</sup> ) |
|-------------------|-------------------|---------------------------------------------|--------------------------------------------------|
| 20                | 30                | 94.92                                       | 90.93                                            |
|                   | 50                | 153.84                                      | 147.37                                           |
|                   | 70                | 212.76                                      | 203.81                                           |
|                   | 90                | 271.68                                      | 260.25                                           |
|                   | 110               | 330.60                                      | 316.70                                           |
| 50                | 30                | 151.61                                      | 87.54                                            |
|                   | 40                | 196.75                                      | 113.60                                           |
|                   | 50                | 241.90                                      | 139.67                                           |
|                   | 60                | 287.04                                      | 165.74                                           |
|                   | 70                | 332.19                                      | 191.80                                           |

**Table S2** Calibrated dose rates for SNR calculation.

| Tube voltage (kV) | Tube current (μA) | Calibrated dose rate (μGy s <sup>-1</sup> ) |
|-------------------|-------------------|---------------------------------------------|
| 20                | 30                | 90.93                                       |
|                   | 50                | 147.37                                      |
|                   | 70                | 203.81                                      |
|                   | 90                | 260.25                                      |
